# Supplementary material for: OsPK2 encodes a plastidic pyruvate kinase involved in rice endosperm starch synthesis, compound granule formation and grain filling
Source: PubMed Central journal article supplement (PMC6181219; doi:10.1111/pbi.12923), 2018-04-17
Supplement: PBI-16-1878-s001.pdf [file PBI-16-1878-s001.pdf]

**Supplementary materials:**

***OsPK2*, encodes a plastidic pyruvate kinase involved in rice endosperm starch synthesis, compound granule formation and grain filling**

Yicong Cai <sup>1,#</sup>, Sanfeng Li <sup>1,#</sup>, Guiai Jiao <sup>1</sup>, Zhonghua Sheng <sup>1</sup>, Yawen Wu <sup>1</sup>, Gaoneng Shao <sup>1</sup>, Lihong Xie <sup>1</sup>, Cheng Peng <sup>2</sup>, Junfeng Xu <sup>2</sup>, Shaoqing Tang <sup>1</sup>, Xiangjin Wei <sup>1,\*</sup>, Peisong Hu <sup>1,\*</sup>

<sup>1</sup> State Key Laboratory of Rice Biology, China National Rice Research Institute, Hangzhou, 310006, China

<sup>2</sup> State Key Laboratory Breeding Base for Zhejiang Sustainable Pest and Disease Control, Institute of Quality and Standard for Agro-products, Zhejiang Academy of Agricultural Sciences; Hangzhou, 310021, China

<sup>#</sup>These authors contributed equally to this work.

**\* Authors for correspondence:**

Peisong Hu: [peisonghu@126.com](mailto:peisonghu@126.com), [hupeisong@caas.cn](mailto:hupeisong@caas.cn)

Xiangjin Wei: [weixiangjin@caas.cn](mailto:weixiangjin@caas.cn)

Phone: +86-571-63370221, Fax: +86-571-63371532

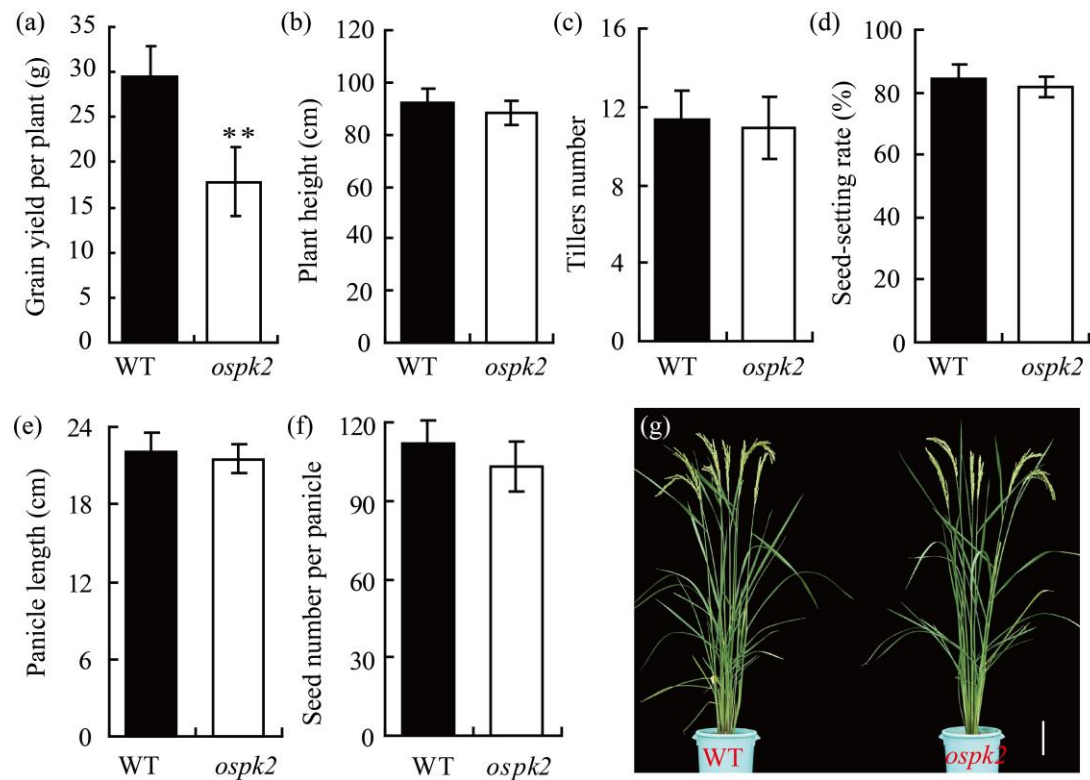

**Figure S1.** Characteristics of wild-type and *ospk2* plants. (a) Grain yield per plant. (b) Plant height. (c) Tillers number. (d) Seed-setting rate. (e) Panicle length. (f) Seed number per panicle. Values are means  $\pm$  SD from three biological replicates, not less than 10 plants in each replication. The asterisks indicate statistical significance compared with the wild-type, as determined by a Student's *t*-test (\*\* $P < 0.01$ ). (g) The plants of wild-type and *ospk2* mutant after heading, bar: 10cm.

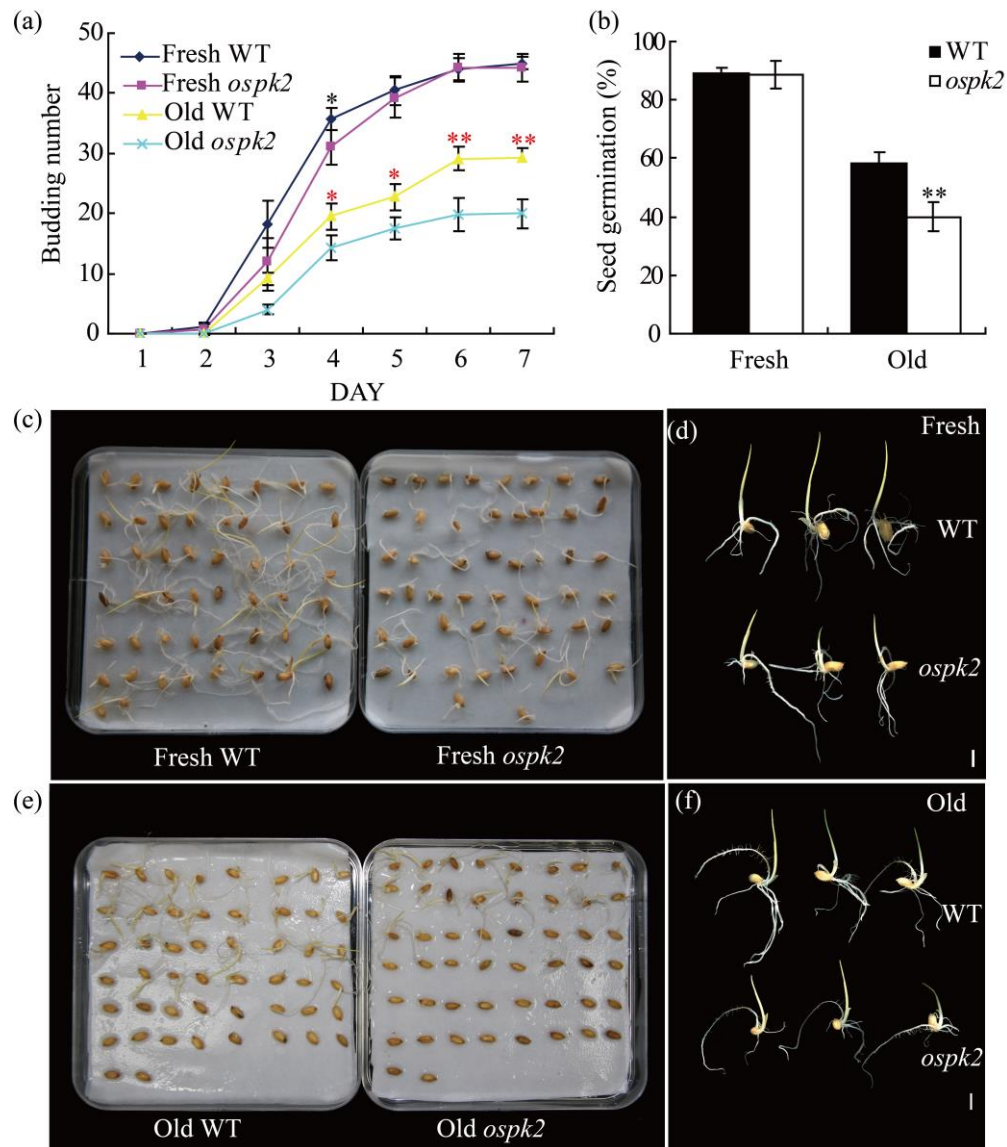

**Figure S2.** The germinability of fresh harvested and one year storage seeds of wild-type and *ospk2*. The experiment was carried out in dark condition with 80% humidity at 28°C. (a) Budding number of wild-type and *ospk2* at various stages of seeds germination. ‘Fresh’ and ‘Old’ represent fresh harvested and one year storage seeds, respectively. (b) Seed germinating rate of wild-type and *ospk2* after 7days induced. (c-f) The photo of fresh harvested (c, d) and one year storage (e, f) seeds after 7d germinated. Bars: 5mm (d, f). Values in (a) and (b) are means  $\pm$  SD from three biological replicates, not less than 50 seeds in each replication. Asterisks in (a) and (b) indicate statistical significance of difference between wild-type and *ospk2*, as determined by a Student’s *t*-test (\*  $P < 0.05$ , \*\*  $P < 0.01$ ).

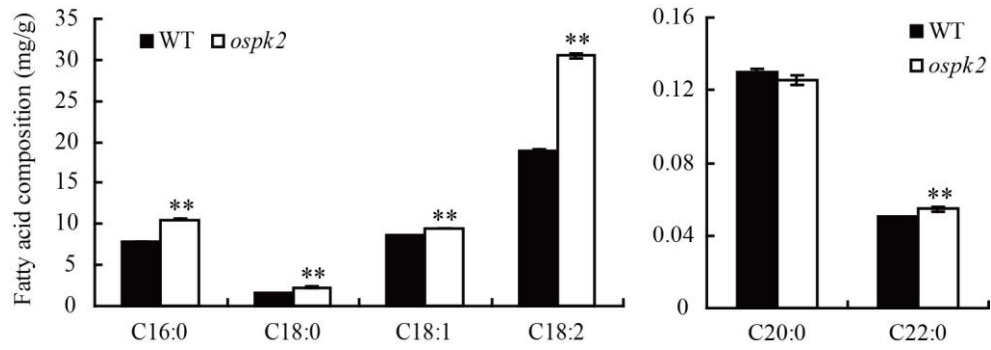

**Figure S3.** Fatty acid composition in mature seeds. The measurement includes long-chain (16 and 18 carbons) and very-long-chain (20 and 22 carbons) fatty acids. C16:0, C18:0, C18:1, C18:2, C20:0 and C22:0 stand for palmitic acid, stearic acid, oleic acid and linoleic acid, arachic acid and behenic acid, respectively. Data are presented as means  $\pm$  *SD* from three biological replicates. Significant difference analyzed by a Student's *t*-test (\*\* $P < 0.01$ ).

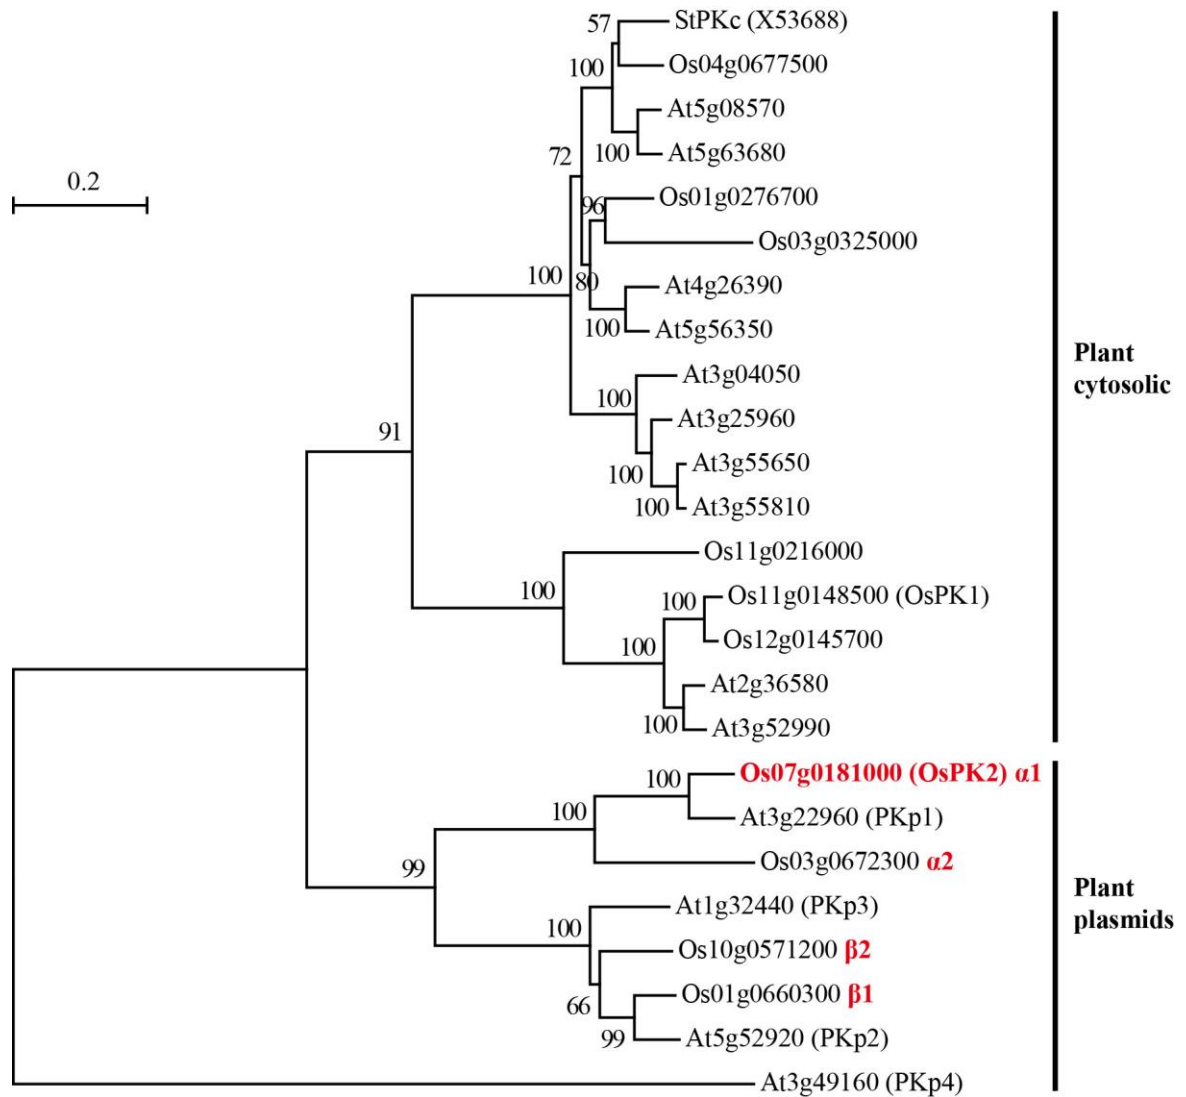

**Figure S4.** Phylogenetic analysis of *OsPK2*. The neighbor-joining tree was generated with MEGA5.2 after aligning the full-length protein sequences. The phylogeny indicates a distinction between the cytosolic and plastidic forms. Abbreviations are as follows: At, *Arabidopsis thaliana*; St, *Solanum tuberosum* (potato);  $\alpha$ , subunit  $\alpha$ ;  $\beta$ , subunit  $\beta$ .

```

Os 01g06603 : -- MAQVVAAGTAAA AAVGRPL-- GGGGS GADALRP AARLSF APRWC----- GGS AGAAR-- ARRESAVTS---- VI SR : 65
At Pkp2 : -- MAQVVATRSI QGS NLS P----- NGGS VS TRS EKLK P AS F AVKVL----- GNEAKRS GRVS VRS RRVVD---- TTVR : 63
Os 10g05712 : ----- MAAAAEI VGS AAAR----- MAAP AVR P APP AAAAAAAP----- P QP RRAVAARS LRT----- ST : 50
At Pkp3 : ----- MAAYGQI SSG TVD----- P QV L S S S RNI GVS L P L R R T L----- I GAGVRS TSI SLR QCSLS----- VR : 55
Os PK2 : ----- MAAT AAAAHT LHL----- AAPR KPS AGP L P P A T L R----- LP SRRLARL T AS C S S G----- : 48
At Pkp1 : MSQSI QF S T P S H T P H LHL----- PHS QFN R P L S S I S F R R F P----- L T T I K Y T S I R A S S S P S P D L D S S : 61
Os 03g06723 : ----- MATS AAAA S T P Y L----- VAAAS S S AAARR----- RGAHRI RAS----- : 36

```

**Pfam: PK**

```

Os 01g06603 : APRLDAE VLPVS ADDDADVKE----- EENF QHLKAI QOLAT S ANGVWS KPNVRRKTKI VCTI GPS INTKEM WKLAE A : 138
At Pkp2 : SARVETEVI PVS PEDV PNR----- EEQLERLLEMQF GDT S VGMMS KPTVRRKTKI VCTVGP S INTREM WKLAE A : 134
Os 10g05712 : SDRVAADLALGS----- NGSL S AQNI AENTADAT S QVVS ANS- RRKTKI VCTI GPS INTREM WKLAE T : 113
At Pkp3 : S I KI SEDSRKPKAYAENGAFD----- VGVLD----- S S YRL ADS RT-- -- S S NDS RRKTKI VCTI GPS S S S REM WKLAE A : 123
Os PK2 : SGNNS AADFPNPNGLI LVAPP S----- AA VAAAS S H I D V D V A T E A D L R E N G F R S T R R T K L V C T V G P A L C G A D E L E A L A V G : 123
At Pkp1 : S S S S S Q V L L S P N G T G A V K S D E R S V V A T A V T I D T S G I E V D T V T E A E L K E N G F R S T R R T K L I C T I G P A L C G F E Q L E A L A V G : 141
Os 03g06723 : ----- S AAAE VEG- - - - - A M D V S E A E L R E K G F M G L R R K T K L V C T V G P A C V G - - A L P A L A R G : 85

```

```

Os 01g06603 : G M N V A R L N M S H G D H A S H K K V I D L V K E Y N A Q T K D- N I L A I M L D T K G P E V R S G D P - - Q P I M L E T G O E F T F T I K R G - V G T E : 213
At Pkp2 : G M N V A R V N M S H G D H A S H K K V I D L V K E Y N A Q T K D- N I L A I M L D T K G P E V R S G D P - - Q P I M L D P G O E F T F T I E R G - V S T P : 209
Os 10g05712 : G M N V A R V N M S H G D H Q S H K K V I D L V K E Y N A K N T D G N V L A I M L D T K G P E V R S G D P - - E P I M L E G O E F N F T I K R G - V S T K : 189
At Pkp3 : G M N V A R L N M S H G D H A S H Q L T I D L V K E Y N S L F V D- K A L A I M L D T K G P E V R S G D P - - Q P I F L E G O E F N F T I K R G - V S L K : 198
Os PK2 : G M N V A R V N M S H G D R E W H R G V I R A V R R L N E E K G F - - A V A V M D T E G S E I H M G D L G G A A A A K A E D G E I W F S V R S F E A P P E : 201
At Pkp1 : G M N V A R L N M C H G T R D W H R G V I R S V R R L N E E K G F - - A V A I M D T E G S E I H M G D L G G E A S A K A E D G E V W F T V E A F D S S R P E : 219
Os 03g06723 : G M V A R V N L C H G R G W H R A V M R E V R R L N E E E G F - - C V S L A V D T E G S Q L L V A D H G G A A S V K A E D G S E W L F T S E R T D E S H P - : 162

```

```

Os 01g06603 : T C V S V N Y D F V N D V E V G D M L L V D G G M S L L V K S K T E D S V K E V I D G C E L K S R R H E N - - - - - V R G K S A T L P S I T D K D W D : 286
At Pkp2 : S C V S V N Y D F V N D V E A G D M L L V D G G M S F M V K S K T K D S V K E V V D G C E L K S R R H E N - - - - - V R G K S A T L P S I T E K D W E : 282
Os 10g05712 : D T V S V N Y D F I N D V E V G D I L L V D G G M S L A V K S K T A D T V K G E V V D G C E L K S R R H E N - - - - - V R G K S A T L P S I T E K D W E : 262
At Pkp3 : D T V S V N Y D F V N D V E V G D I L L V D G G M S L A V K S K T S D L V K C V I D G C E L Q S R R H E N - - - - - V R G K S A T L P S I T D K D W E : 271
Os PK2 : R T I H V N Y E G F A E D V R V G D E L L V D G G M R F E V V E R L G P D V K R C T D P G L L L P R A N E T F W R D G S I V R E R N A M L P T I S S K D W L : 281
At Pkp1 : R T I S V S Y T G F A E D V R V G D E L L V D G G M R F E V I E K I G P D V K C L C T D P G L L L P R A N E T F W R D G S I V R E R N A M L P T I S S K D W L : 299
Os 03g06723 : F T M H V N F L K F S E D I L V G D E L V I D G G M A T F E V I E K V G N D L R C K C T D P G L L L P R A K I S F W R N G K I V E R N F G L P T L S A K D W A : 241

```

**Ser (WT) → Leu (*ospk2*)**

```

Os 01g06603 : D I K F G V N Q V D I Y A V S F V K D A Q V H E L K D Y L R S N - - A D I E V I V K I E S A O S I P N L H S I I T A S D G A N V A R G D L G A E L P I E E : 364
At Pkp2 : D I K F G V N K V D I Y A V S F V K D A Q V H E L K K Y L Q N S G - - A D I E V I V K I E S A O S I P N L H S I I T A S D G A N V A R G D L G A E L P I E E : 360
Os 10g05712 : D I K F G V N G V D I Y A V S F V K D A K V H E L K D Y L K S A N - - A D I E V I P K I E S A O S I P N L Q S I I T A S D G A N V A R G D L G A E L P I E E : 340
At Pkp3 : D I K F G V N Q V D I Y A V S F V K D A K V H E L K N Y L K T C S - - A D I S V I V K I E S A O S I K N L P S I I S A C D G A N V A R G D L G A E L P I E E : 349
Os PK2 : D I D F G I S E G V D I I A V S F V K S A E M I N H L K S Y I A A R S R G S D I A V I A K I E S I D S L K N L E E I I R A S D G A N V A R G D N G A O I P L E Q : 361
At Pkp1 : D I D F G I A E G V D I I A V S F V K S A E M I N H L K S Y L A A R S R G E I G V I A K I E S I D S L N E E E I I L A S D G A N V A R G D L G A O I P L E Q : 379
Os 03g06723 : D I E F G I A E G V D C I A L S F V K D A N D I K Y L K T Y L S R K S - L E H I K I F A K V E S L E S L K N L K D I T E A S D G V V V A R G D L G V O I P L E Q : 320

```

```

Os 01g06603 : V P L L Q E E I I R M C R S M G K A V I V A T N V L E S M I V H P T P T R A E V S D I A I A V R E G S D G I M L S G E T A H G K F P L K A V K V M H T V A L R I : 444
At Pkp2 : V P L L Q E E I I N L C R S M G K A V I V A T N V L E S M I V H P T P T R A E V S D I A I A V R E G A D A V M L S G E T A H G K F P L K A A G V M H T V A L R I : 440
Os 10g05712 : V P L L Q E E I V R T C R S M G K P V I V A T N V L E S M I D H P T P T R A E V S D I A I A V R E G S D A I M L S G E T A H G K F P L K A V K V M H T V A Q R T : 420
At Pkp3 : V P L L Q E E I I R R C R S I E K P V I V A T N V L E S M I N H P T P T R A E V S D I A I A V R E G A D A I M L S G E T A H G K F P L K A V N V M H T V A L R I : 429
Os PK2 : V P S V Q Q K I V K L C R Q L N K P V I V A S Q L L E S M E Y P T P T R A E A D V S E A V R Q R A D A L M L S G E S A M G R Y P E K A L S V L R S V L R I : 441
At Pkp1 : V P A A Q Q R I V Q V C R A L N K P V I V A S Q L L E S M E Y P T P T R A E A D V S E A V R Q R S D A L M L S G E S A M G Q F P K A L V L R T V S L R I : 459
Os 03g06723 : I P A I Q E A I V D L C R R L N K P V I V A S Q L L E S V E Y P T P T R A E A D V S E A V R Q Y A D A V M L S A E S A I G A Y P Q A L A V L R A A S E R M : 400

```

**Pfam: PK\_C**

```

Os 01g06603 : E A T M S G G E T P A N I G - - - - - Q V F K N H S E M F A Y H S T M S N T L G T - S I V V F T R I G F V A L L S H Y R P S G T I F A F T D Q E R : 514
At Pkp2 : E A T I T S G E M P N I G - - - - - Q A F K N H S E M F A Y H T M S N T L G T - S T V V F T R I G F V A L L S H Y R P S G T I Y A F T N E K K : 510
Os 10g05712 : E S S L Y N P T T S P S I V A H P Q A L L N E E F S Q S Q L S K M F G S H A T M A N T L C T - P I I V F T R I G S V A V L L S H Y R P S S T I F A F T N E E R : 499
At Pkp3 : E A S L P V R - T S A S R T - - - - - T A Y K G H G M G M F A F H A S I M A N T E S S - P I I V F T R I G S V A V L L S H Y R P S A T I F A F T N Q R R : 498
Os PK2 : E K W W R E E K R H E E L E L K D V S - - - - - S S F S D R I S E I C I S A A K M A N K L E V D A V F V Y T T S G H V A S L L S R C R P D C P I F A F T T S T S : 517
At Pkp1 : E R W W R E E K R H E S V P L Q A I G - - - - - S S F S D R I S E I C N S A A K M A N N L G V D A V F V Y T T S G H V A S L V S R C R P D C P I F A F T T T S : 535
Os 03g06723 : E S W S R E E N M Q K L L P Q H Q L A - - - - - I A L P D R I S E I Q I C T S A A E M A N N L A V D A L V F V Y T K Y G H V A S L L S R N R E N P P I F A F T D N A N : 476

```

```

Os 01g06603 : V R Q L A L Y Q G V C P V Q M E S D D A E K T F G D A L S Y L L K H G N V S E G E E V A L V Q S G - R O P I W R S Q S T H N I Q V R K V - - - : 583
At Pkp2 : Q Q L A L Y Q G V C P I Y M E T D D A E E T F A N A L A T L K Q G N V K G E E L A I V Q S G - T O P I W R S Q S T H N I Q V R K V - - - : 579
Os 10g05712 : V K Q L A L Y Q G V V P I Y N K F S D D A E E T F S R A I S S L L N A Q F V S E G D Y V T L V Q S G - V K S I W R E E S T H H I Q V R K V Q G - - : 570
At Pkp3 : I M D L A L Y Q G V M P I Y N E S D D A E D T Y A R S L K L Q D E N M L E G H V T L V Q S G - S Q P I W R E E S T H L I Q V R K I K I G G : 571
Os PK2 : V R R L N I O W G L I P F R I S E S D D M E S N L N R T F S L E K A R G M I Q S G D L M I A L S D - - - - - M Q S I Q M N V P - - - : 578
At Pkp1 : V R R L N I O W G L I P F R I S E S D D M E S N L N K T F S L E K S R G M I S G D L M I A V S D - - - - - M Q S I Q M N V P - - - : 596
Os 03g06723 : S R K S M N E Y W G V I P L Q I P L S N N M E D N F N Q T I K L V K S K G S V S G D T L V V A D S D L N R P R A A T S V F Q S I Q V R I V D - - - : 548

```

**Figure S5** Amino acid sequence alignment between OsPK2 and other homologous proteins. The sequences alignment was generated with ClustalX2. White alphabet with black background means 100% identity, white alphabet with grey background represents 80% identity, and black alphabet with light grey background stands for 60% identity. OsPK2 shared 39.47%, 53.48%, 39.43%, 74.33%, 37.29%, 37.73% amino acid identity with Os01g0660300 (PKpβ1), Os03g0672300 (PKpα2), Os10g0571200 (PKpβ2), AtPKp1 (At3g22960), AtPKp2 (At5g52920) and AtPKp3 (At1g32440), respectively. Amino acid sequence underline with red color and blue

color represent the domain of PK and PK\_C. The red arrowhead shows the mutation site of *ospk2*.

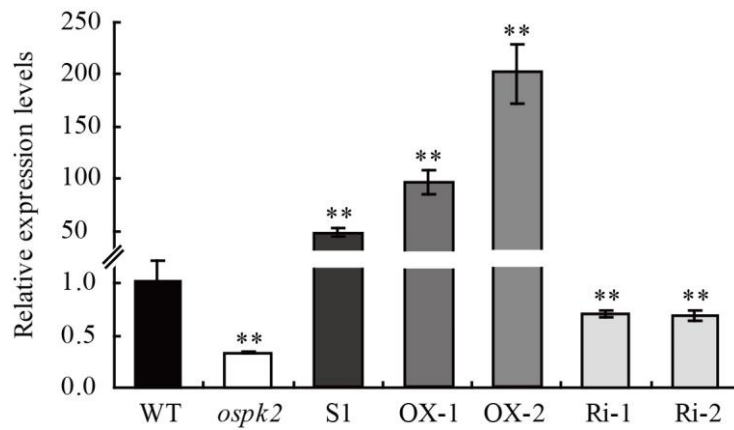

**Figure S6.** qRT-PCR analysis of *OsPK2* in transgenic plants. S1, the complemented transgenic line; OX-1 and OX-2, overexpression the *OsPK2* gene in the *ospk2* mutant; Ri-1 and Ri-2, two *OsPK2* RNAi lines. RNA was isolated from leaf of WT, *ospk2* and transgenic plants. The value of ubiquitin mRNA was used as an internal control. Relative expression was calculated expressions of *OsPK2* in WT was set as reference value of 1. Data are presented as mean  $\pm$  SD from three biological replicates. Asterisks indicate statistical significance compared with the wild-type, as determined by a Student's *t*-test (\*\* $P < 0.01$ ).



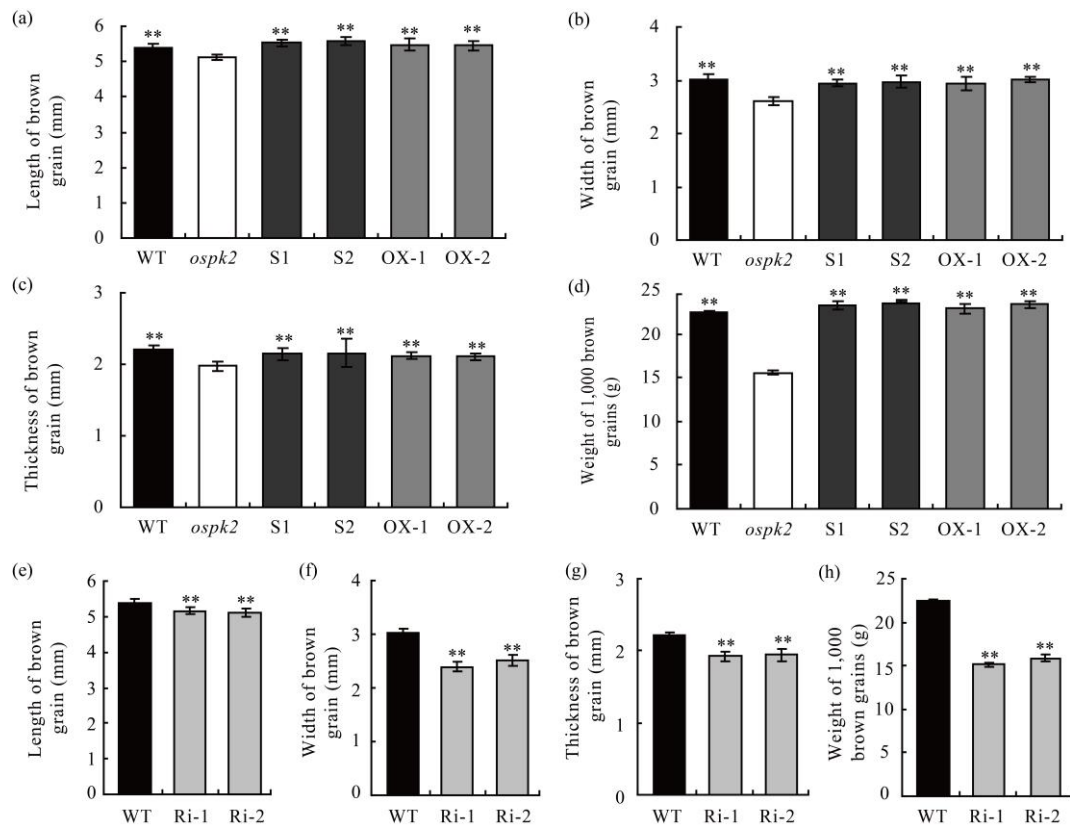

**Figure S7.** Analysis of *OsPK2* transgenic plants. (a-d) The grain length (a), width (b), thickness (c) and 1000-grain weight (d) of brown grains of *OsPK2* complemented and overexpression transgenic plants. (e-h) The grain length (e), width (f), thickness (g) and 1000-grain weight (h) of brown grains of *OsPK2*-RNAi transgenic plants. S1 and S2 are two complemented transgenic lines. OX-1 and OX-2 are two overexpression transgenic lines. Ri-1 and Ri-2 are two *OsPK2* RNAi lines. Data are shown as mean  $\pm$  SD from three biological replicates. Each replication was not less than 50 (a-c, e-g) and 200 (d, h) seeds, respectively. Asterisks in (a-d) indicated the statistical significance from the compare of complemented lines, OX lines and WT with *ospk2*, and asterisks in (e-f) indicated the statistical significance between Ri lines and WT, determined by a Student's *t*-test (\*\* $P < 0.01$ ).

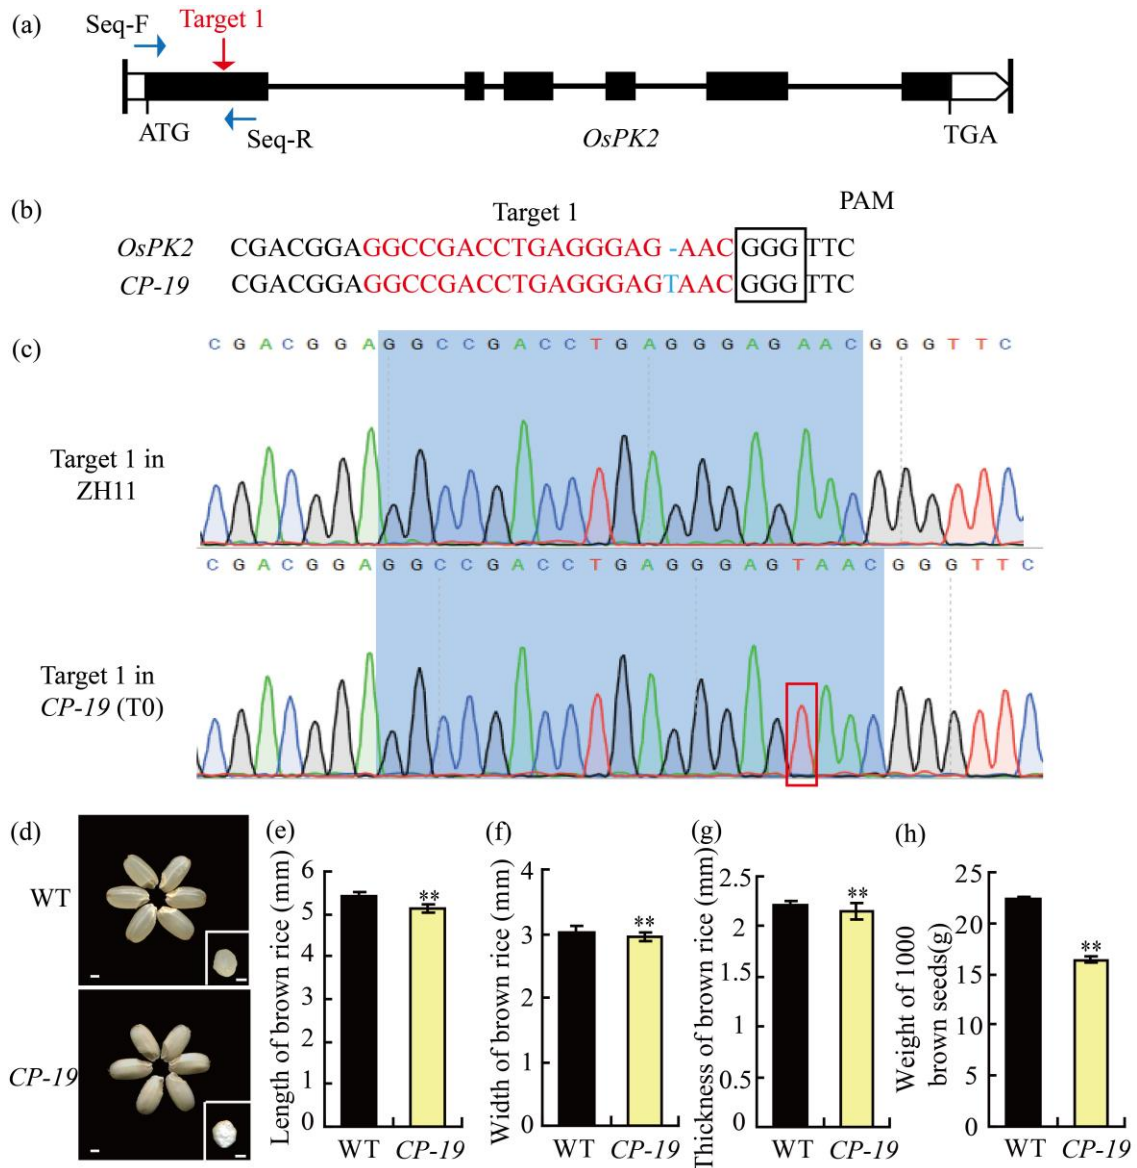

**Figure S8.** Analysis of *OsPK2* CRISPR/CAS9 mediated editing. (a) *OsPK2* structure. (b) PAM sequence and *OsPK2* editing. (c) Target region sequencing in ZH11 and T<sub>0</sub> plant. (d) Appearance and transverse sections of mature seeds of wild-type and *OsPK2* knock out line (*CP-19*). Bars: 1mm. (e-h) The grain length (e), width (f), thickness (g) and weight of 1,000 grains (h) of brown rice of wild-type and *OsPK2* knock out line (*CP-19*). *CP-19* is a homozygous mutant line of *OsPK2* by CRISPR/CAS9 mediated editing. Data in (e-h) are shown as mean  $\pm$  SD from three biological replicates, and each replication was not less than 50 (e-g) and 200 (h) seeds, respectively. Asterisks indicate statistical significance as determined by a Student's *t*-test (\*\* $P < 0.01$ ).

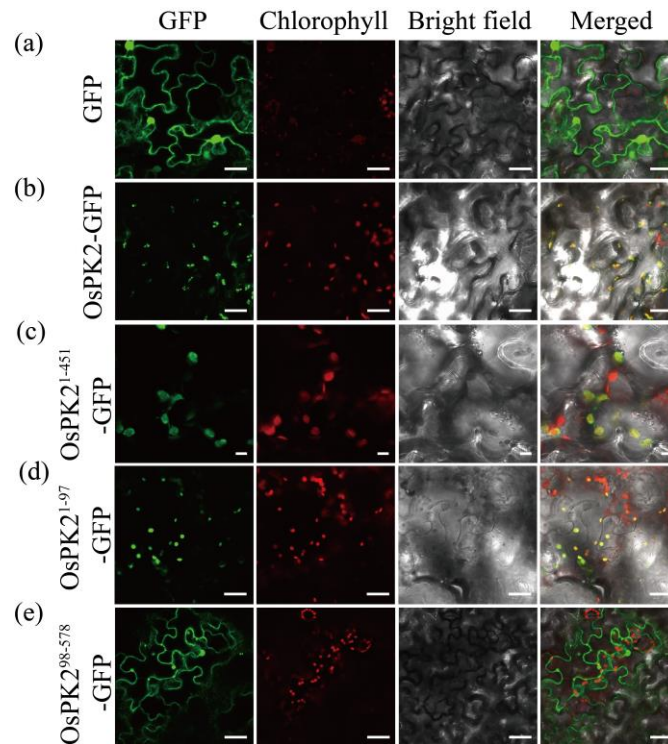

**Figure S9.** Subcellular localization of OsPK2 and truncated OsPK2 in tobacco cells. (a) free GFP used as a control; (b) OsPK2 full-length coding region and GFP fusion protein (OsPK2-GFP); (c) the N-terminal 451AA of OsPK2 and GFP fusion protein (OsPK2<sup>1-451</sup>-GFP); (d) the N-terminal 97AA of OsPK2 and GFP fusion protein (OsPK2<sup>1-97</sup>-GFP) and (e) OsPK2-GFP fusion protein lacking the N-terminal 97AA (OsPK2<sup>98-578</sup>-GFP). 48h after transformation, tobacco cells were observed using a confocal laser scanning microscope. GFP signals, chlorophyll autofluorescence, bright-field images, and the merged images of GFP signal and chlorophyll signals are shown in each panel. Bars: 10 $\mu$ m.

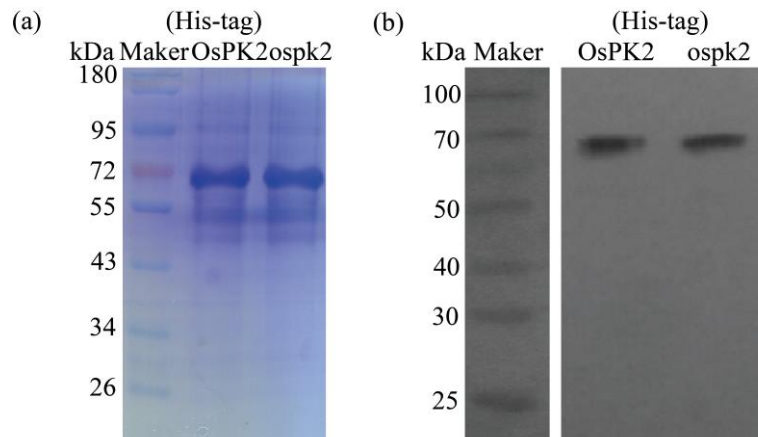

**Figure S10.** SDS-PAGE (a) and western-blot (b) analysis of his-OsPK2 and his-ospk2 purified from baculovirus expression system under native condition. (a) The full-length CDS of OSPK2 from wild-type and *ospk2* were cloned into the baculovirus expression vector PFAST-BAC I. Proteins with his-tag were purified from Bac-to-Bac baculovirus expression system, and subjected to SDS-PAGE with 10% (w/v) separating gel. Add 8 $\mu$ g protein in each lane for electrophoresis. The gel was stained with Coomassie blue R-250. The molecular masses of the band in SDS-PAGE were similar to the value of predicted size of OsPK2 (63.5kDa). (b) Western blot analysis of OsPK2 and ospk2 protein by with His-tag antibody. Samples with 8  $\mu$ g/lane were electrophoresed on SDS-PAGE with 10% (w/v) separating gel and blot transferred to a polyvinylidene difluoride (PVDF) membrane. The bands in membrane were closed to the molecular masse of predicted size of OsPK2.

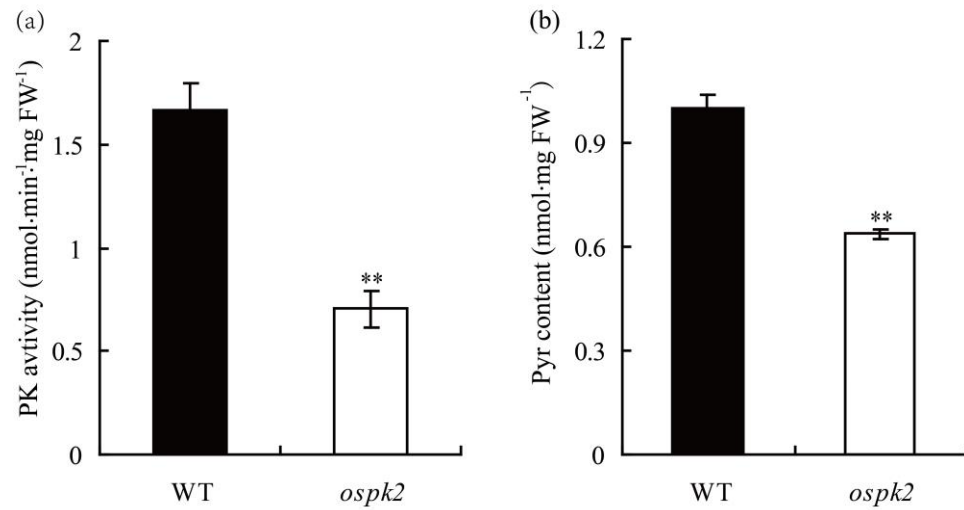

**Figure S11.** PK activity assay in leaves. (a) PK activity of the crude enzyme solution extracted from fresh leaves from WT and *ospk2*. (b) Pyruvate content of leaves from WT and *ospk2*. Data are shown as mean  $\pm$  SD from three independent replicates. Asterisks indicate statistical significance as determined by a Student's *t*-test (\*\* $P < 0.01$ ).

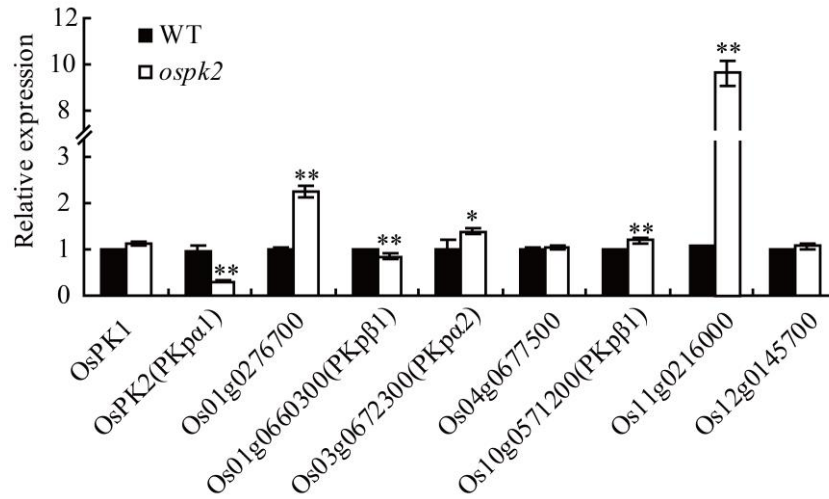

**Figure S12.** qRT-PCR analysis of genes encoding putative PK in rice. Data are presented as mean  $\pm$  SD from three independent replicates. RNA was isolated from WT and *ospk2* panicle at the heading stage. Asterisks indicate statistical significance compared with the wild-type, as determined by a Student's *t*-test (\* $P$  < 0.05, \*\* $P$  < 0.01).

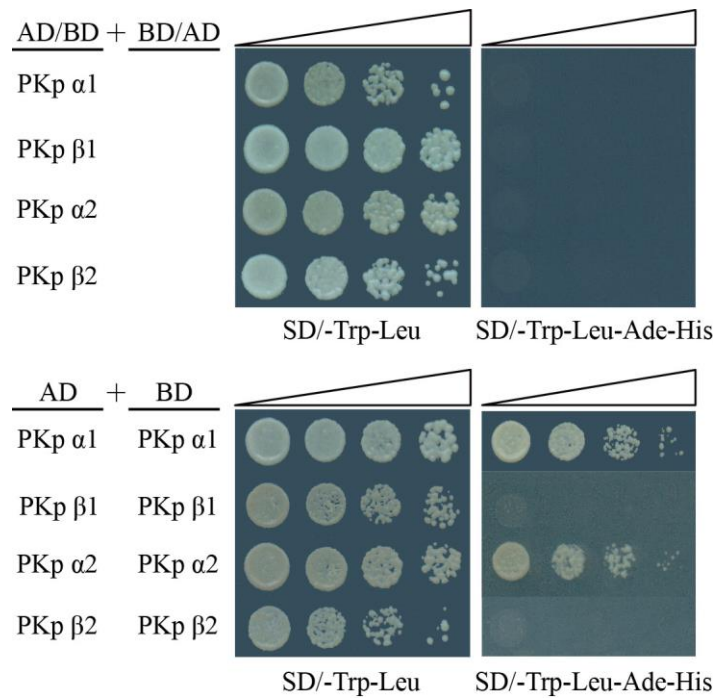

**Figure S13.** Yeast two-hybrid assays showed that both OsPK2 (PKp $\alpha$ 1) and PKp $\beta$ 1 can interact with itself. *OsPK2* and other PK members were fused to activation domain (AD) or binding domain (BD). Serial dilutions (10-fold) of yeast cells expressing the indicated proteins were plated onto nonselective medium (SD/-Leu/-Trp) (left) or selective medium (SD/-Leu/-Trp/-Ade/ -His) (right).

**Table S1. Gene products of the nine predicted ORFs in the fine mapping region.**

| Number | Locus      | Description of function                                   |
|--------|------------|-----------------------------------------------------------|
| ORF1   | Os07g08300 | major facilitator superfamily antiporter                  |
| ORF2   | Os07g08320 | RNA recognition motif containing protein                  |
| ORF3   | Os07g08330 | ribosomal protein L4                                      |
| ORF4   | Os07g08340 | pyruvate kinase                                           |
| ORF5   | Os07g08350 | C4-dicarboxylate transporter/malic acid transport protein |
| ORF6   | Os07g08360 | expressed protein                                         |
| ORF7   | Os07g08370 | expressed protein                                         |
| ORF8   | Os07g08380 | expressed protein                                         |
| ORF9   | Os07g08390 | plant-specific domain TIGR01615 family protein            |



**Table S2. Primers used in this study.**

| Use                               | Primer name           | Sequence (5' to 3')                       |
|-----------------------------------|-----------------------|-------------------------------------------|
| <b>Fine mapping</b>               | RM3484-F              | TCCGGTCGTCCTCATCGTATCC                    |
|                                   | RM3484-R              | GCCCTCTTGCTCCCACATCG                      |
|                                   | RM8010-F              | CAGCTTCAGCTCCTAATGGTTGC                   |
|                                   | RM8010-R              | GCCTCTCAGAGCCTTCTTCTTCC                   |
|                                   | RM21078-F             | CAAGCTGCCGTGTTCTACTGG                     |
|                                   | RM21078-R             | GCACACAACAAGAGACAGTAACATGC                |
|                                   | RM7479-F              | AGCGCCACATGGTGGCTTAGG                     |
|                                   | RM7479-R              | CACCGACTTATGCGAGTCGTTCCG                  |
|                                   | In18F                 | TTTGGTGCTGCCATTGTCTG                      |
|                                   | In18R                 | GCCTCGGAGCTGACGTTGA                       |
|                                   | In19F                 | CGCATTGTACTACCTTCTC                       |
|                                   | In19R                 | TATTCACCAGTTTTCCCTC                       |
|                                   | In20F                 | AAAGGAAAAGGAGAAATAC                       |
|                                   | In20R                 | AGTTTGGTGTGATGGATAT                       |
|                                   | In25F                 | GCTGCTATTGCTATCCATCC                      |
|                                   | In25R                 | ATCTGCCTGTGCTTGCTCT                       |
|                                   | In27F                 | GCTTGGCTTTGACGAACCCTC                     |
|                                   | In27R                 | CGACATCGCCGCTACCAGA                       |
| <b>Sequencing</b>                 | F1                    | CATTGTTGTAGCTCAGTGTCTGTG                  |
|                                   | R1                    | TGAGGCTCGCTCAACTTGAT                      |
|                                   | F2                    | TGTTCTAGGGCTCATGGCTT                      |
|                                   | R2                    | GTGAAGTGAATGAACCCGAC                      |
|                                   | F3                    | TCCATCACATGAAAACCTTCTC                    |
|                                   | R3                    | GGCAGCTAAGCTCACCTCCG                      |
|                                   | F4                    | AGGCCGACCTGAGGGAGAA                       |
|                                   | R4                    | TGCTAGATAGCGGTCAAGCC                      |
|                                   | F5                    | GGCAGTCATAAGCTCTGTTC                      |
|                                   | R5                    | CAGTTCAACCATCAAACCATGT                    |
|                                   | F6                    | AGACTTTGGAATTTCTGAAGGC                    |
|                                   | R6                    | TCGATTCAAGAAGCTGCGAC                      |
|                                   | F7                    | GGAGATAATCCGTGCTCAG                       |
|                                   | R7                    | TACAACGCGCTGGAAGTTGC                      |
|                                   | F8                    | GTGTTTGTGTTCTGCCCA                        |
|                                   | R8                    | AACCATGCAGTAACTGTGCCAA                    |
| <b>Binary vector construction</b> | 1300-OsPK2-KpnI-F     | CTCAATTTCGAGCTCGGTACCTTGATTCATTGTAGGAGGAG |
|                                   | 1300-OsPK2-HindIII-R  | GGCCAGTGCCAAGCTTATGGCTGAGACTTGAGATTA      |
|                                   | 1390-OsPK2-kpnI-F     | GGGGTACCATGGCCGCCACCGCCGCCG               |
|                                   | 1390-OsPK2-SpeI-R     | GGACTAGTTCAAGGTACGTTTCATGACC              |
|                                   | 1390RNAi-OsPK2-KpnI-F | GGGGTACCGGAGGAGATAATCCGTGC                |
|                                   | 1390RNAi-OsPK2-SacI-R | CGAGCTCCATGTGGCCAGTGTTTGT                 |

|                                 |                              |                                                 |
|---------------------------------|------------------------------|-------------------------------------------------|
|                                 | 1390RNAi-OsPK2-PstI-F        | AACTGCAGCATGTGGCCAGTGTTTGT                      |
|                                 | 1390RNAi-OsPK2-BamHI-R       | CGGGATCCGGAGGAGATAATCCGTGC                      |
| <b>Crispr Cas9</b>              | U3-OsPK2-F                   | GGCAGGCCGACCTGAGGGAGAAC                         |
|                                 | U3-OsPK2-R                   | AAACGTTCTCCCTCAGGTCGGCC                         |
|                                 | Cas9-check-F                 | TCATCAAAAGCATCCTCTC                             |
|                                 | Cas9-check-R                 | AGCACGCATTCTACTCAC                              |
| <b>GUS</b>                      | 1305-OsPK2-EcoRI-F           | CCATGATTACGAATTCCGCAGTGAGCGTTGTCTT              |
|                                 | 1305-OsPK2-NcoI-R            | CTCAGATCTACCATGGCCCTTCTCCTCGTTGAGC              |
| <b>Subcellular localization</b> | 1305GFP -OsPK2-SpeI-F        | GCCAGATCAACTAGTATGGCCGCCACCGCCGCCGC             |
|                                 | 1305GFP -OsPK2-BamHI-R       | TGCTCACCATGGATCCAGGTACGTTTCATGACCTGGA           |
|                                 | OsPK2(1-97)-BamHI-R          | TGCTCACCATGGATCCCCGGAACCCGTTCTCCCTCA            |
|                                 | OsPK2 $\Delta$ 1-97-SpeI-F   | GCCAGATCAACTAGTATGAGCACGCGGCACCAA               |
|                                 | OsPK(21-451)-BamHI-R         | TGCTCACCATGGATCCATGGCGCTTCTCCTCTCTCC            |
|                                 | OsPK2 $\Delta$ 1-451-SpeI-F  | GCCAGATCAACTAGTATGGAGGAACTGGAACCTAA             |
| <b>Protein expression</b>       | OsPK2- PFAST-BACI-F          | GAAGCGCGCGGAATTCATGGCCGCCACCGCCGCCG             |
|                                 | OsPK2- PFAST-BACI-R          | CCAGGTCATGAACGTACCTCATCACCATCACCATCACTGAAAGCTTG |
| <b>Yeast two-hybrid assays</b>  | pGBKT7-OsPk2-EcoRI-F         | CATGGAGGCCGAATTCATGGCCGCCACCGCCGCCGC            |
|                                 | pGBKT7-OsPk2-PstI-R          | TAGTTATGCGGCCGCTGCAGTCAAGGTACGTTTCATGACCT       |
|                                 | pGADT7-OsPk2-EcoRI-F         | GGAGGCCAGTGAATTCATGGCCGCCACCGCCGCCGC            |
|                                 | pGADT7-OsPk2-BamHI-R         | CGAGCTCGATGGATCCTCAAGGTACGTTTCATGACCT           |
|                                 | pGBKT7-PK $\alpha$ 2-EcoRI-F | CATGGAGGCCGAATTCATGGCAACCTCCGCCGCCG             |
|                                 | pGBKT7-PK $\alpha$ 2-PstI-R  | TAGTTATGCGGCCGCTGCAGCTAGTCCACTATTCGAACT         |
|                                 | pGADT7-PK $\alpha$ 2-EcoRI-F | GGAGGCCAGTGAATTCATGGCAACCTCCGCCGCCG             |
|                                 | pGADT7-PK $\alpha$ 2-BamHI-R | CGAGCTCGATGGATCCCTAGTCCACTATTCGAACT             |
|                                 | pGBKT7-PK $\beta$ 1-EcoRI-F  | CATGGAGGCCGAATTCATGGCGGCGGCGGCGGCTG             |
|                                 | pGBKT7-PK $\beta$ 1-PstI-R   | TAGTTATGCGGCCGCTGCAGTTAGCCCTGGACTTTCCTC         |
|                                 | pGADT7-PK $\beta$ 1-EcoRI-F  | GGAGGCCAGTGAATTCATGGCGGCGGCGGCGGCTG             |
|                                 | pGADT7-PK $\beta$ 1-BamHI-R  | CGAGCTCGATGGATCCTTAGCCCTGGACTTTCCTC             |
|                                 | pGBKT7-PK $\beta$ 2-EcoRI-F  | CATGGAGGCCGAATTCATGGCGCAGGTGGTGGCTG             |
|                                 | pGBKT7-PK $\beta$ 2-PstI-R   | TAGTTATGCGGCCGCTGCAGTCAAACCTTCTGACCTGA          |
|                                 | pGADT7-OsPk2-EcoRI-F         | GGAGGCCAGTGAATTCATGGCGCAGGTGGTGGCTG             |
|                                 | pGADT7-PK $\beta$ 2-BamHI-R  | CGAGCTCGATGGATCCTCAAACCTTCTGACCTGA              |
| <b>BiFc Assays</b>              | pSPYNE-OsPK2-F               | GCCTACTAGTGGATCCATGGCCGCCACCGCCGCCGC            |
|                                 | pSPYNE-OsPK2-R               | GAGCGGTACCCTCGAGAGGTACGTTTCATGACCTGGA           |
|                                 | pSPYCE-OsPK2-F               | CGATAGTACTGTTCGACATGGCCGCCACCGCCGCCGC           |
|                                 | pSPYCE-OsPK2-R               | CCCGGGAGCGGTACCAGGTACGTTTCATGACCTGGA            |
|                                 | pSPYNE-PK $\alpha$ 2-F       | GCCTACTAGTGGATCCATGGCAACCTCCGCCGCCG             |
|                                 | pSPYNE-PK $\alpha$ 2-R       | GAGCGGTACCCTCGAGCTAGTCCACTATTCGAACT             |
|                                 | pSPYCE-PK $\alpha$ 2-F       | CGATAGTACTGTTCGACATGGCAACCTCCGCCGCCG            |
|                                 | pSPYCE- PK $\alpha$ 2-R      | CCCGGGAGCGGTACCCTAGTCCACTATTCGAACT              |
|                                 | pSPYNE-PK $\beta$ 1-F        | GCCTACTAGTGGATCCATGGCGGCGGCGGCGGCTG             |
|                                 | pSPYNE-PK $\beta$ 1-R        | GAGCGGTACCCTCGAGTTAGCCCTGGACTTTCCTC             |

|                 |                         |                                      |
|-----------------|-------------------------|--------------------------------------|
|                 | pSPYCE-PKp $\beta$ 1-F  | CGATAGTACTGTTCGACATGGCGGCGGGCGGGCTG  |
|                 | pSPYCE- PKp $\beta$ 1-R | CCCGGGAGCGGTACCTTAGCCCTGGACTTTCCTC   |
|                 | pSPYNE-PKp $\beta$ 2-F  | GCCTACTAGTGGATCCATGGCGCAGGTGGTGGCTG  |
|                 | pSPYNE-PKp $\beta$ 2-R  | GAGCGGTACCCTCGAGTCAAACCTTCCTGACCTGA  |
|                 | pSPYCE-PKp $\beta$ 2-F  | CGATAGTACTGTTCGACATGGCGCAGGTGGTGGCTG |
|                 | pSPYCE- PKp $\beta$ 2-R | CCCGGGAGCGGTACCTCAAACCTTCCTGACCTGA   |
| <b>Q-RT-PCR</b> | qRT-PCR-OsPK2-F         | CATGAGGAACTGGAACCTAAA                |
|                 | qRT-PCR-OsPK2-R         | GACGAAAACGGCATCTAC                   |
|                 | qRT-PCR-Ubi-F           | GCTCCGTGGCGGTATCAT                   |
|                 | qRT-PCR-Ubi-R           | CGGCAGTTGACAGCCCTAG                  |
|                 | LOC_Os01g16960-RT-F     | GGTGTCCCAAACAAGATTGA                 |
|                 | LOC_Os01g16960- RT-R    | TCTCAACCTTTGACATCAGCA                |
|                 | LOC_Os01g47080-RT-F     | TGTTTCGTGGAAAGAGCG                   |
|                 | LOC_Os01g47080-RT-R     | AAAGAAACGGCATAGTAGTCA                |
|                 | LOC_Os03g20880-RT-F     | GACCTTATGCTGGTTCGA                   |
|                 | LOC_Os03g20880-RT-R     | CATCAACATTAGCAACACCT                 |
|                 | LOC_Os03g46910-RT-F     | ACAGACCCAGGTTTGCTTCT                 |
|                 | LOC_Os03g46910-RT-R     | CCAATCCTTTGCTGACAATG                 |
|                 | LOC_Os04g58110-RT-F     | GCTCTGTCGTTTGTCCGTAA                 |
|                 | LOC_Os04g58110-RT-R     | TTTCAACCTTTGACATCAGCTT               |
|                 | LOC_Os10g42100-RT-F     | GCAGTTCGTGAAGGTTCTGA                 |
|                 | LOC_Os10g42100-RT-R     | GGATTCTGTTCTCTGTGCCA                 |
|                 | LOC_Os11g05110-RT-F     | AAGCCTGCTGTTGTTACTCGT                |
|                 | LOC_Os11g05110-RT-R     | TCACTCCCGTCAAGTACAGC                 |
|                 | LOC_Os11g10980-RT-F     | GGGCTCTGATCCAACAAAGT                 |
|                 | LOC_Os11g10980-RT-R     | CTCCTCAGTACTCGCCATCA                 |
|                 | LOC_Os12g05110-RT-F     | AAGTATAGGCCAACCATGCC                 |
|                 | LOC_Os12g05110-RT-R     | GAGCGATTGTCTTGCTTCAA                 |
